# Supplementary material for: Surfactant free superparamagnetic iron oxide nanoparticles for stable ferrofluids in physiological solutions
Source: Royal Society of Chemistry journal article supplement (doi:10.1039/c4cc09277e), 2015-01-01
Supplement: c4cc09277e1.pdf [file c4cc09277e1.pdf]

## Supplementary Information

### Surfactant free superparamagnetic iron oxide nanoparticles for stable ferrofluids in physiological solutions

K. Mandel,<sup>\*a</sup> M. Straßer,<sup>a,c</sup> T. Granath,<sup>b</sup> S. Dembski<sup>a</sup> and G. Sextl<sup>a,c</sup>

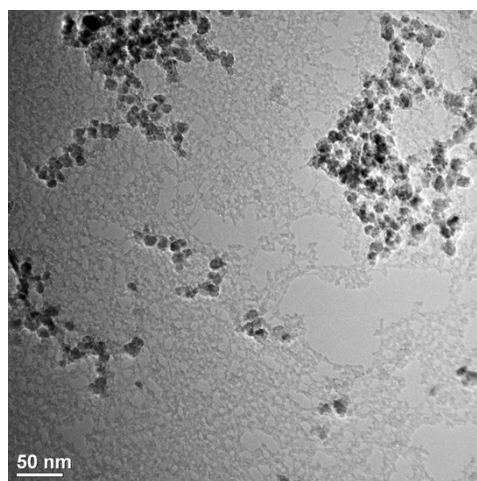

**Fig. S1:** As described in the experimental section, besides the particles, forming the ferrofluid, which are found in the middle-layer phase of the centrifuge tube (and which are described in the paper), there was also an upper, clearer layer and a gel-like bottom sediment observed in the tube. This figure shows that the bottom layer phase (the gel-like layer) consists of iron oxide nanoparticles (dark spots) enclosed in network of condensed silica (bright, web-like structure).
